# Supplementary material for: Identification of Potential Plasma Biomarkers for Abdominal Aortic Aneurysm Using Tandem Mass Tag Quantitative Proteomics
Source: MDPI journal article supplement (doi:10.3390/proteomes6040043), 2018-10-18
Supplement: s1 [file s1]

**Supplementary Table S1. TMT-labeling setup**

TMT 6 plex kit, Pierce (Thermo Scientific), Lot no: NE172480A

**Set 1 (A4 in result files)**

|           |     |     |     |     |     |     |
|-----------|-----|-----|-----|-----|-----|-----|
| Sample    | P1  | C1  | S1  | L1  | S5  | C5  |
| TMT label | 126 | 127 | 128 | 129 | 130 | 131 |

**Set 2 (B4 in result files)**

|           |     |     |     |     |     |     |
|-----------|-----|-----|-----|-----|-----|-----|
| Sample    | P2  | C2  | S2  | L2  | L5  | C6  |
| TMT label | 126 | 127 | 128 | 129 | 130 | 131 |

**Set 3 (C4 in result files)**

|           |     |     |     |     |     |     |
|-----------|-----|-----|-----|-----|-----|-----|
| Sample    | P3  | C3  | S3  | L3  | S6  | C7  |
| TMT label | 126 | 127 | 128 | 129 | 130 | 131 |

**Set 4 (D4 in result files)**

|           |     |     |     |     |     |     |
|-----------|-----|-----|-----|-----|-----|-----|
| Sample    | P4  | C4  | S4  | L4  | L6  | C8  |
| TMT label | 126 | 127 | 128 | 129 | 130 | 131 |

Sample coding: P=Pooled sample, C=Control (no aneurysm), S=Small aneurysm, L=Large aneurysm
